# Supplementary material for: Hydrochemistry and Diatom Assemblages on the Humpata Plateau, Southwestern Angola
Source: MDPI journal article supplement (doi:10.3390/geosciences11090359), 2021-08-25
Supplement: s1 [file s1]

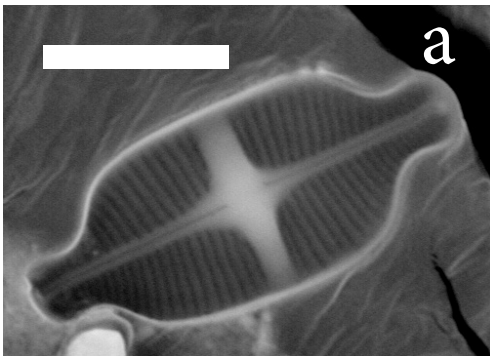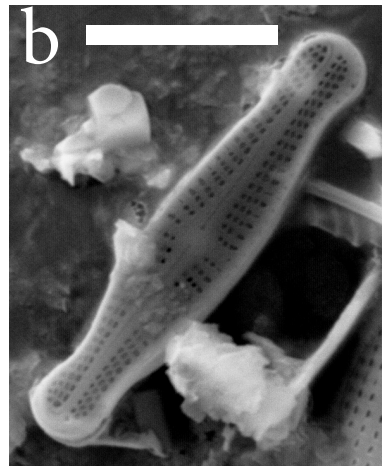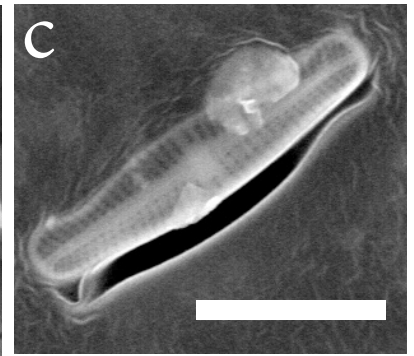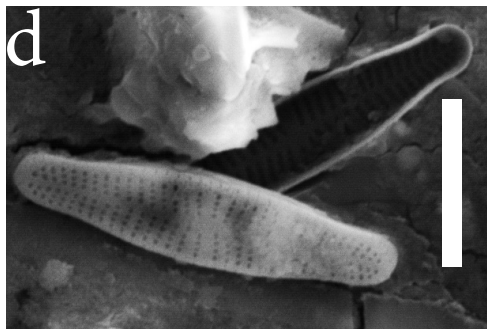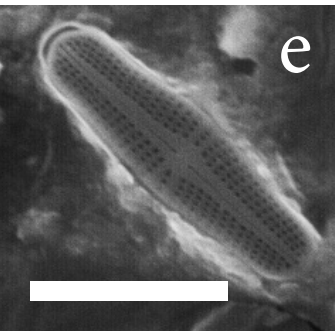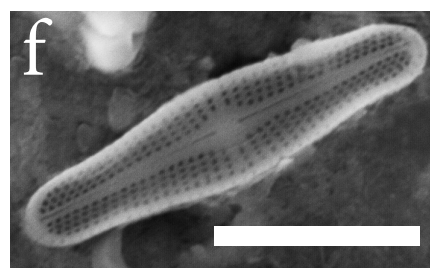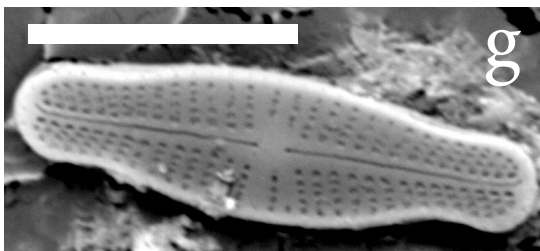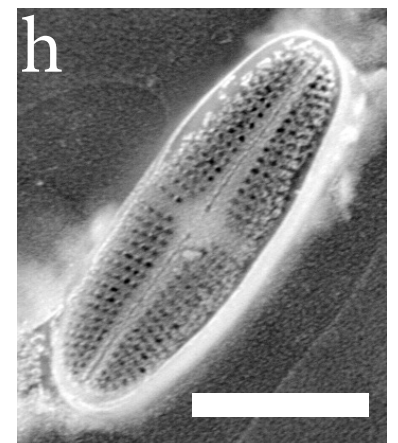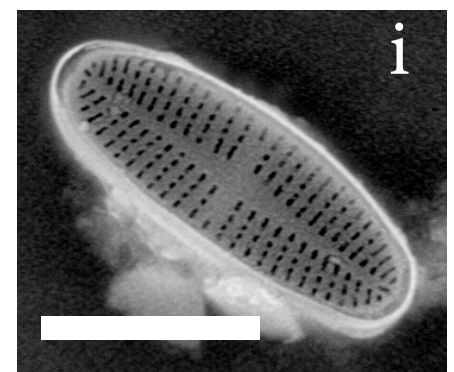

**a** *Achnanthidium exiguum* (Grunow) Czarnecki; **b** *Achnanthidium macrocephalum* (Hustedt) Round & Bukhtiyarova; **c** *A. macrocephalum*; **d** *Achnanthidium minutissimum* (Kützing) Czarnecki; **e** *A. minutissimum*; **f** *A. minutissimum*; **g** *A. minutissimum*; **h** *Achnanthidium saprophilum* (H.Kobayashi & Mayama) Round & Bukhtiyarova; **i** *A. saprophilum*

all scale bars = 5 micrometers

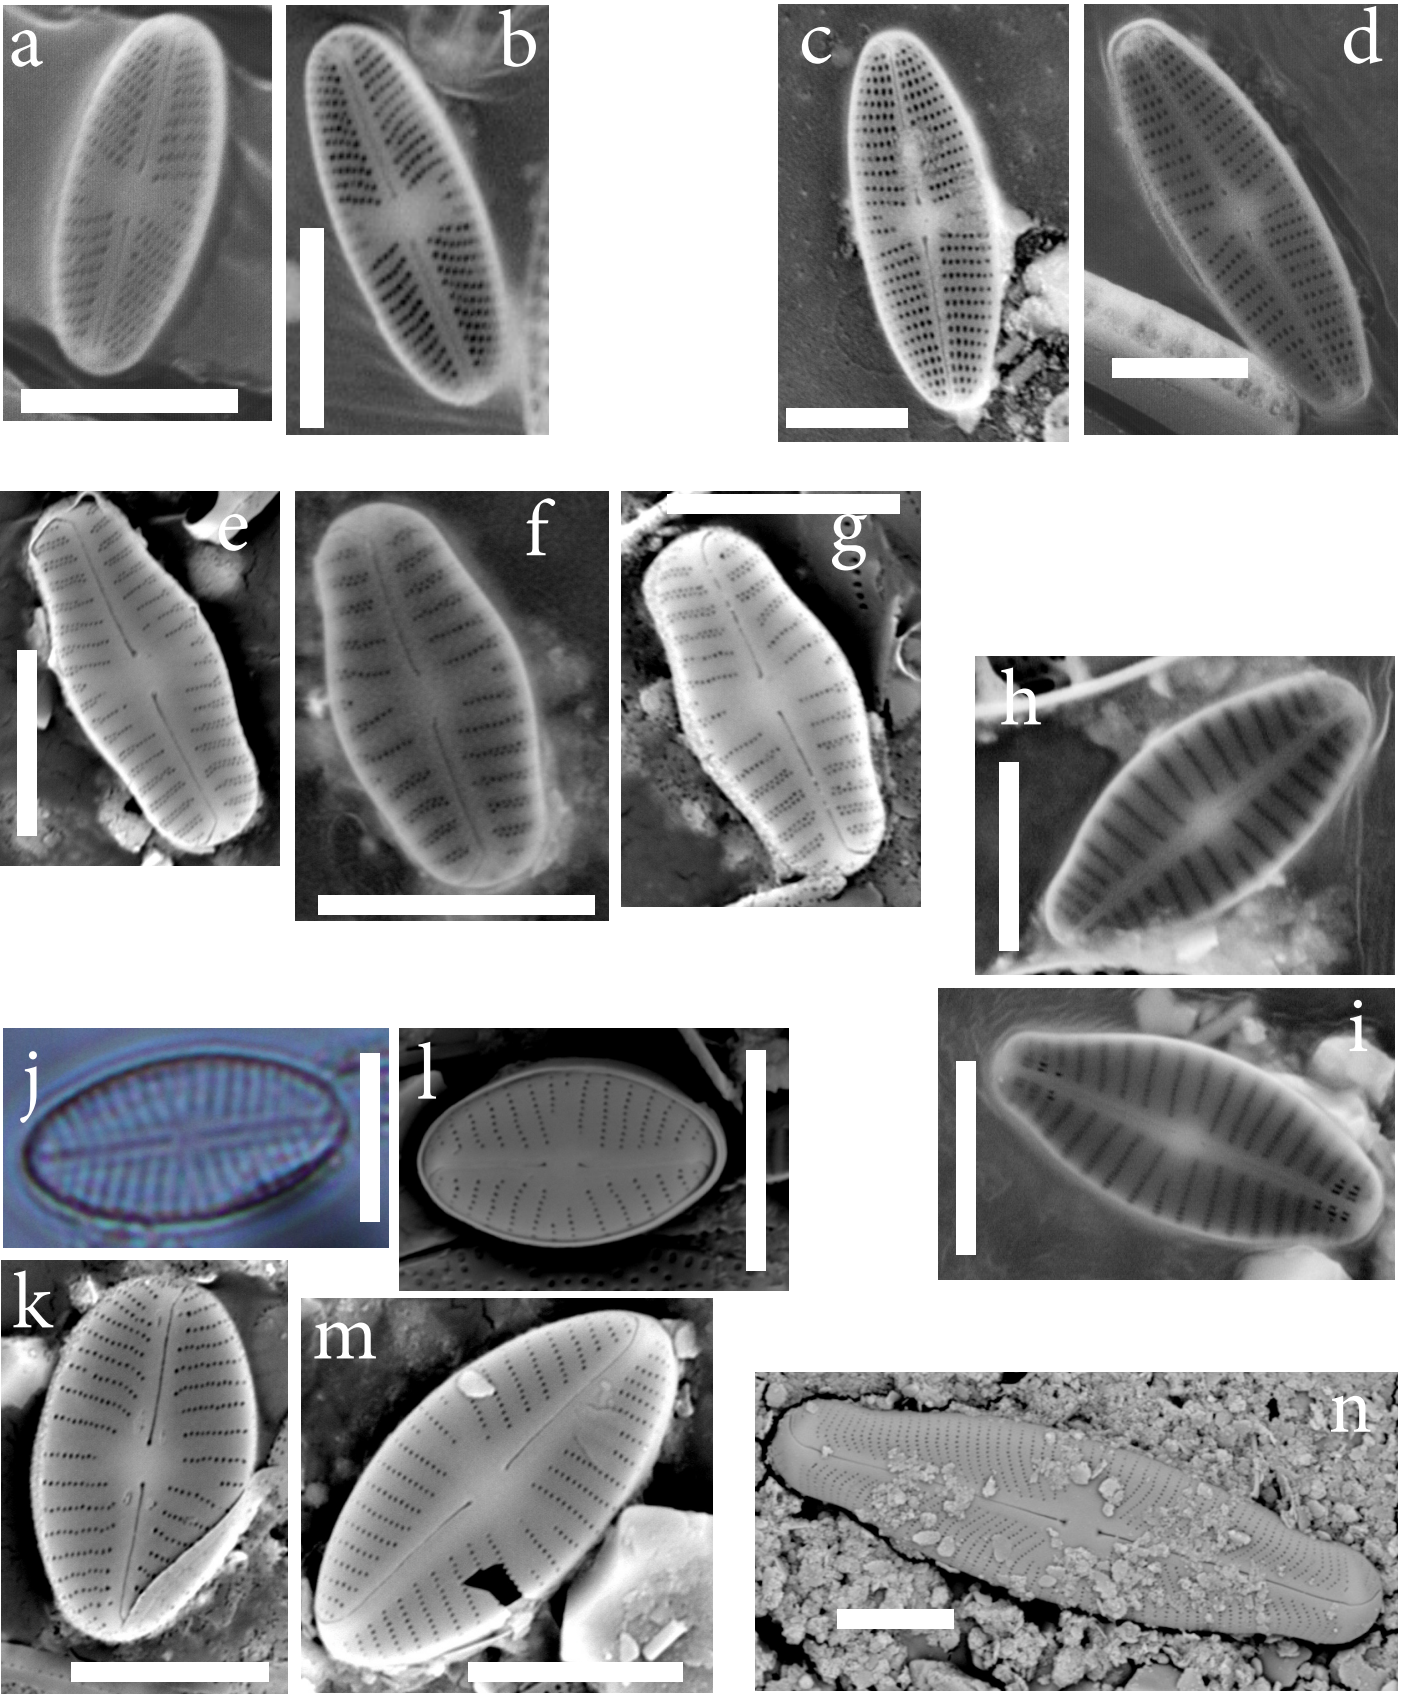

**a** *Sellaphora* cf. *atomoides* (Grunow) Wetzel & Van de Vijver; **b** *S.* cf. *atomoides* (Grunow); **c** *Geissleria* sp1; **d** *Geissleria* sp1; **e** *Sellaphora* cf. *saugerresii* (Desmazières) C.E.Wetzel & D.G.Mann; **f** *S.* cf. *saugerresii*; **g** *S.* cf. *saugerresii*; **h** *Geissleria* sp2; **i** *Geissleria* sp2; **j** *Sellaphora* sp *nigri* (De Notaris) Wetzel & Ector; **k** *S.* sp *nigri*; **l** *S.* sp *nigri*; **m** *S.* sp *nigri*; **n** *Sellaphora* *pupula* (Kützing) Mereschkovsky

all scale bars = 5 micrometers

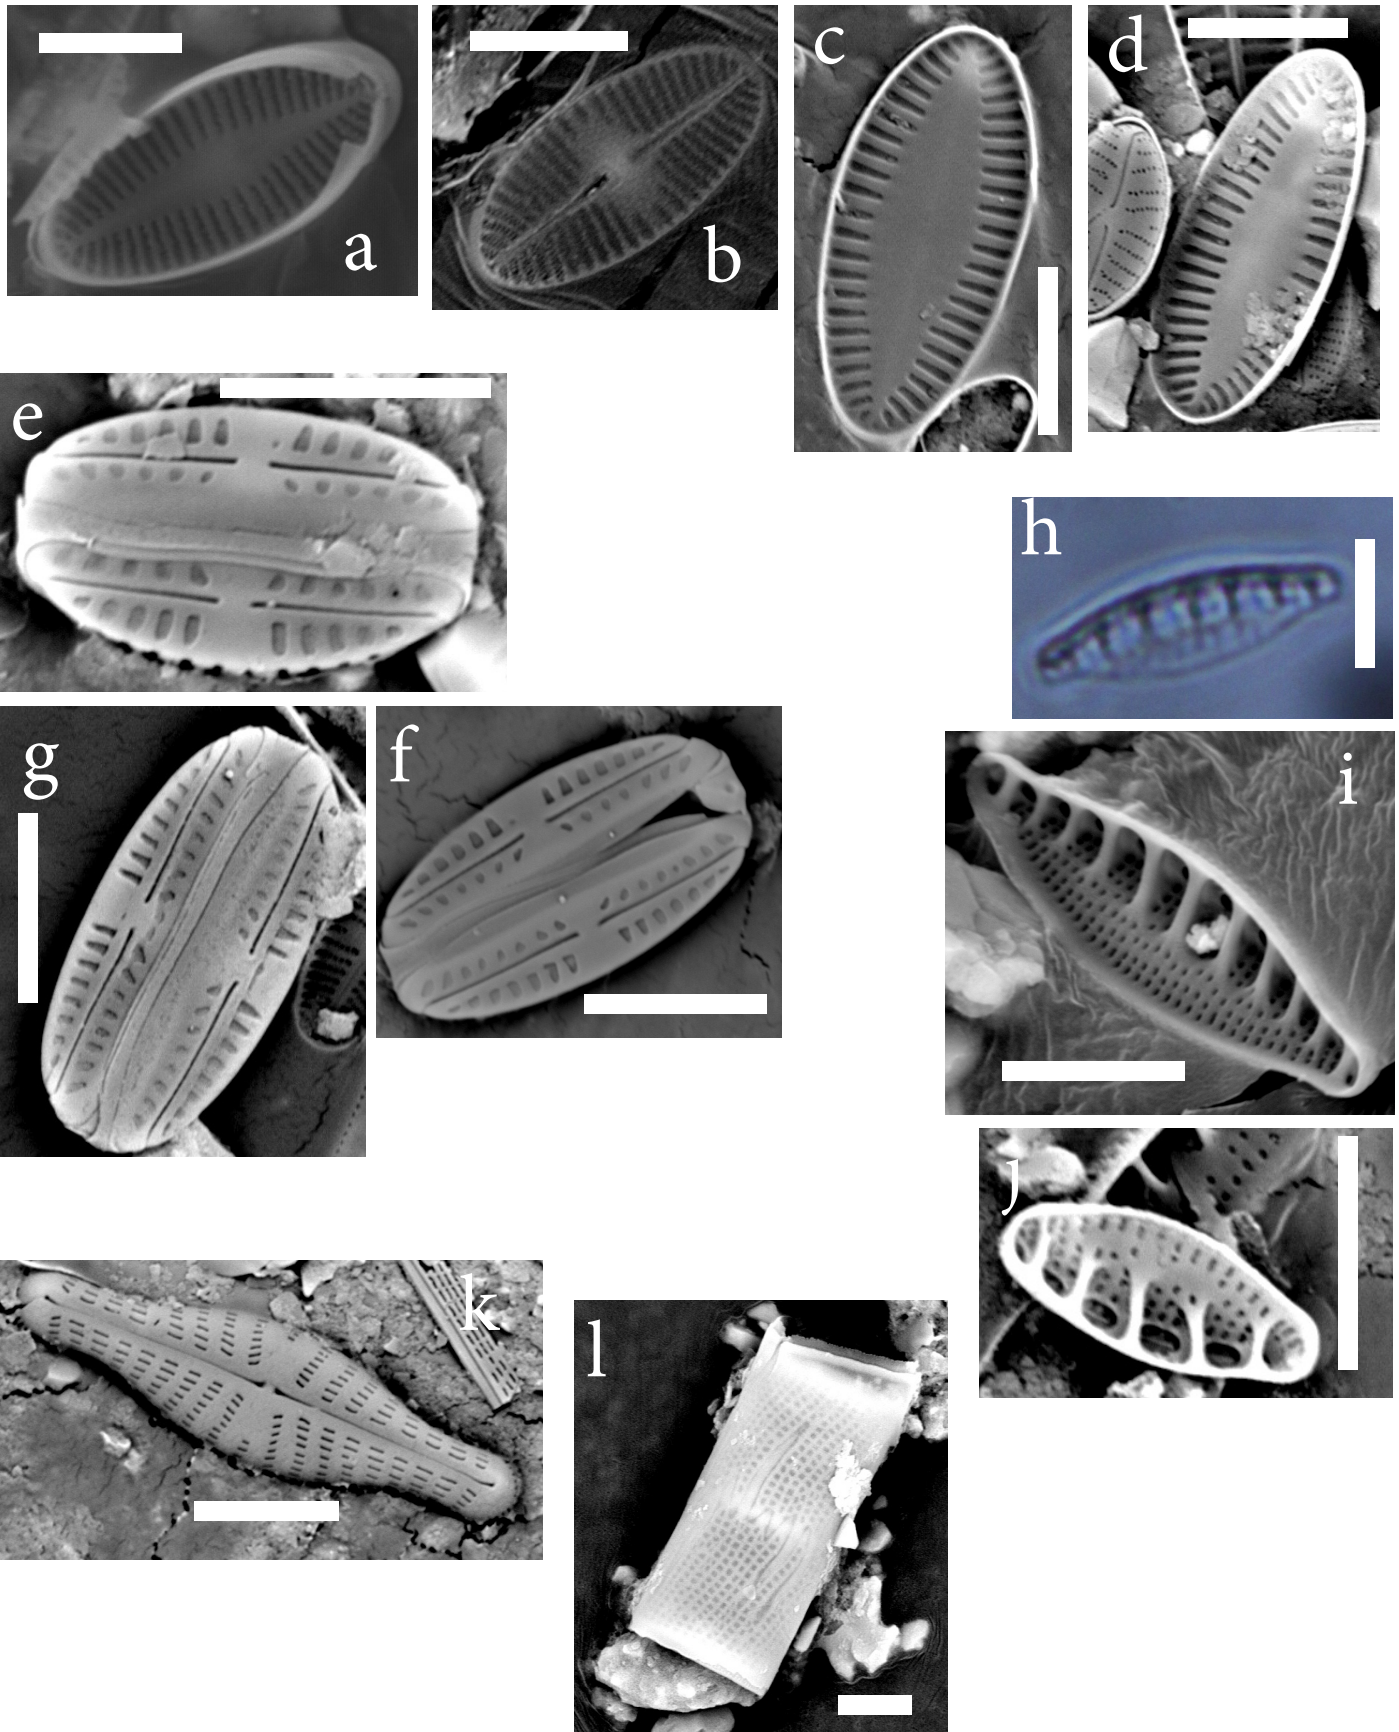

**a** *Platessa hustedtii* (Krasske) Lange-Bertalot; **b** *P. hustedtii*; **c** *P. hustedtii*; **d** *P. hustedtii*; **e** *Amphora pediculus* (Kützing) Grunow; **f** *A. pediculus*; **g** *A. pediculus*; **h** *Grunowia solgensis* (A.Cleve) Aboal; **i** *G. solgensis*; **j** *G. solgensis*; **k** *Hippodonta capitata* (Ehrenberg) Lange-Bertalot, Metzeltin & Witkowski; **l** *Aulacoseira ambigua* (Grunow) Simonsen

all scale bars = 5 micrometers

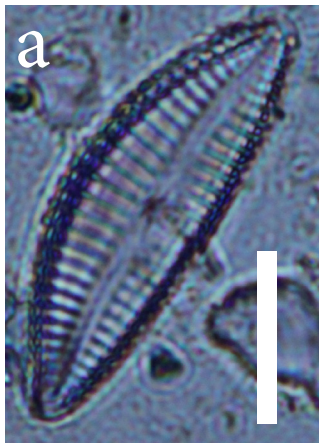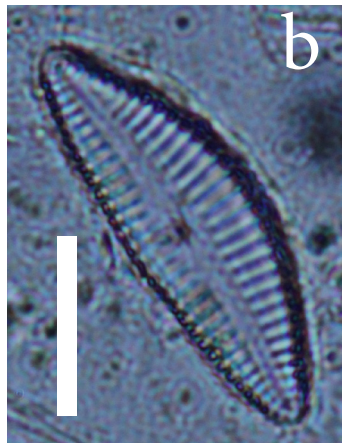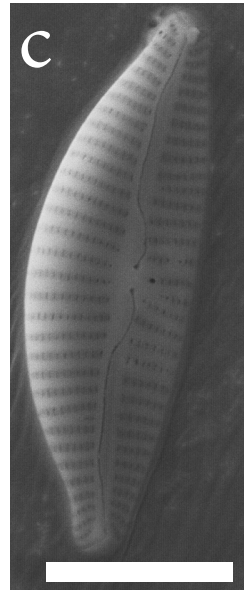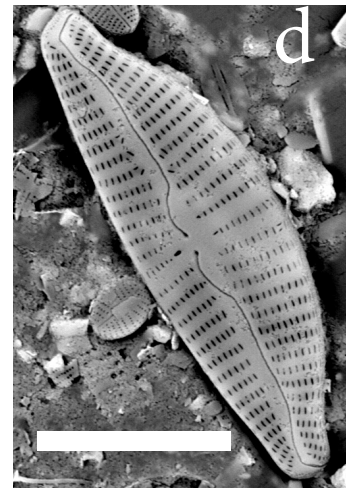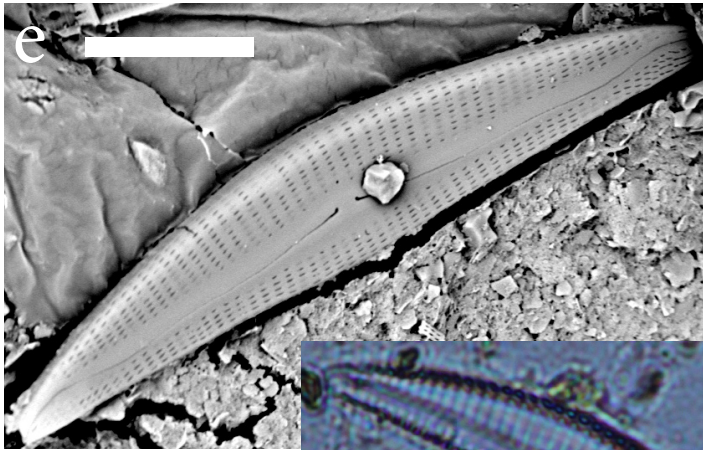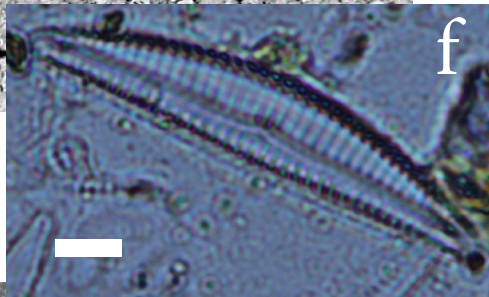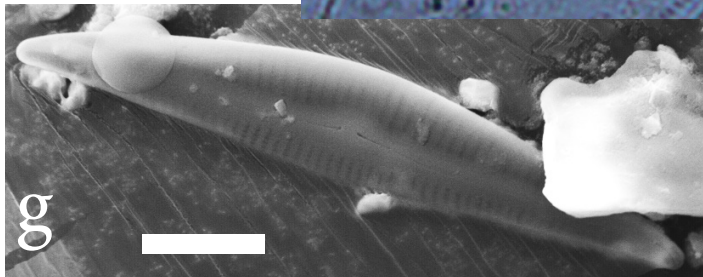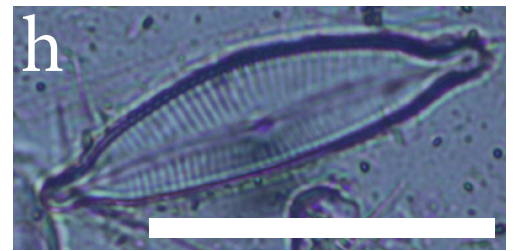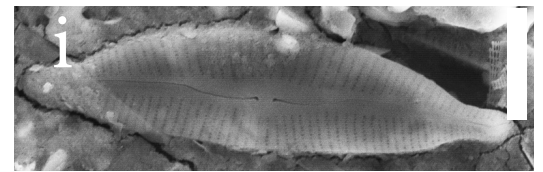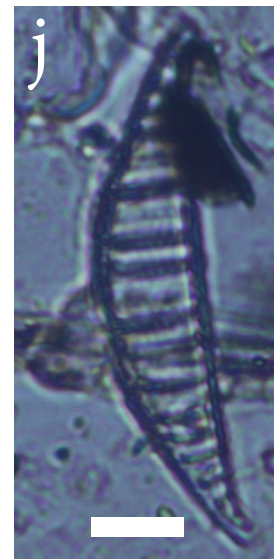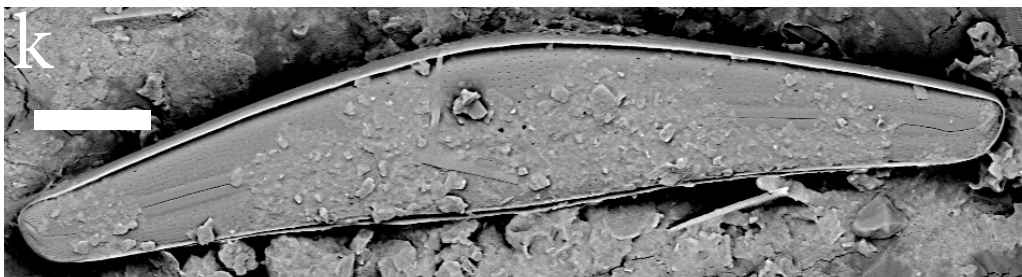

**a** *Cymbella cf. affinis* Kützing; **b** *C. cf. affinis*; **c** *C. cf. affinis*; **d** *C. cf. affinis*; **e** *Encyonema neogracile* Krammer; **f** *E. neogracile*; **g** *E. neogracile*; **h** *Cymboplectra naviculiformis* (Auerswald ex Heiberg) Krammer; **i** *C. naviculiformis*; **j** *Epithemia gibberula* (Ehrenberg) Kützing; **k** *Cymbella aspera* (Ehrenberg) Cleve  
scale bars (a-j) = 10 micrometers; scale bar (k) = 20 micrometers

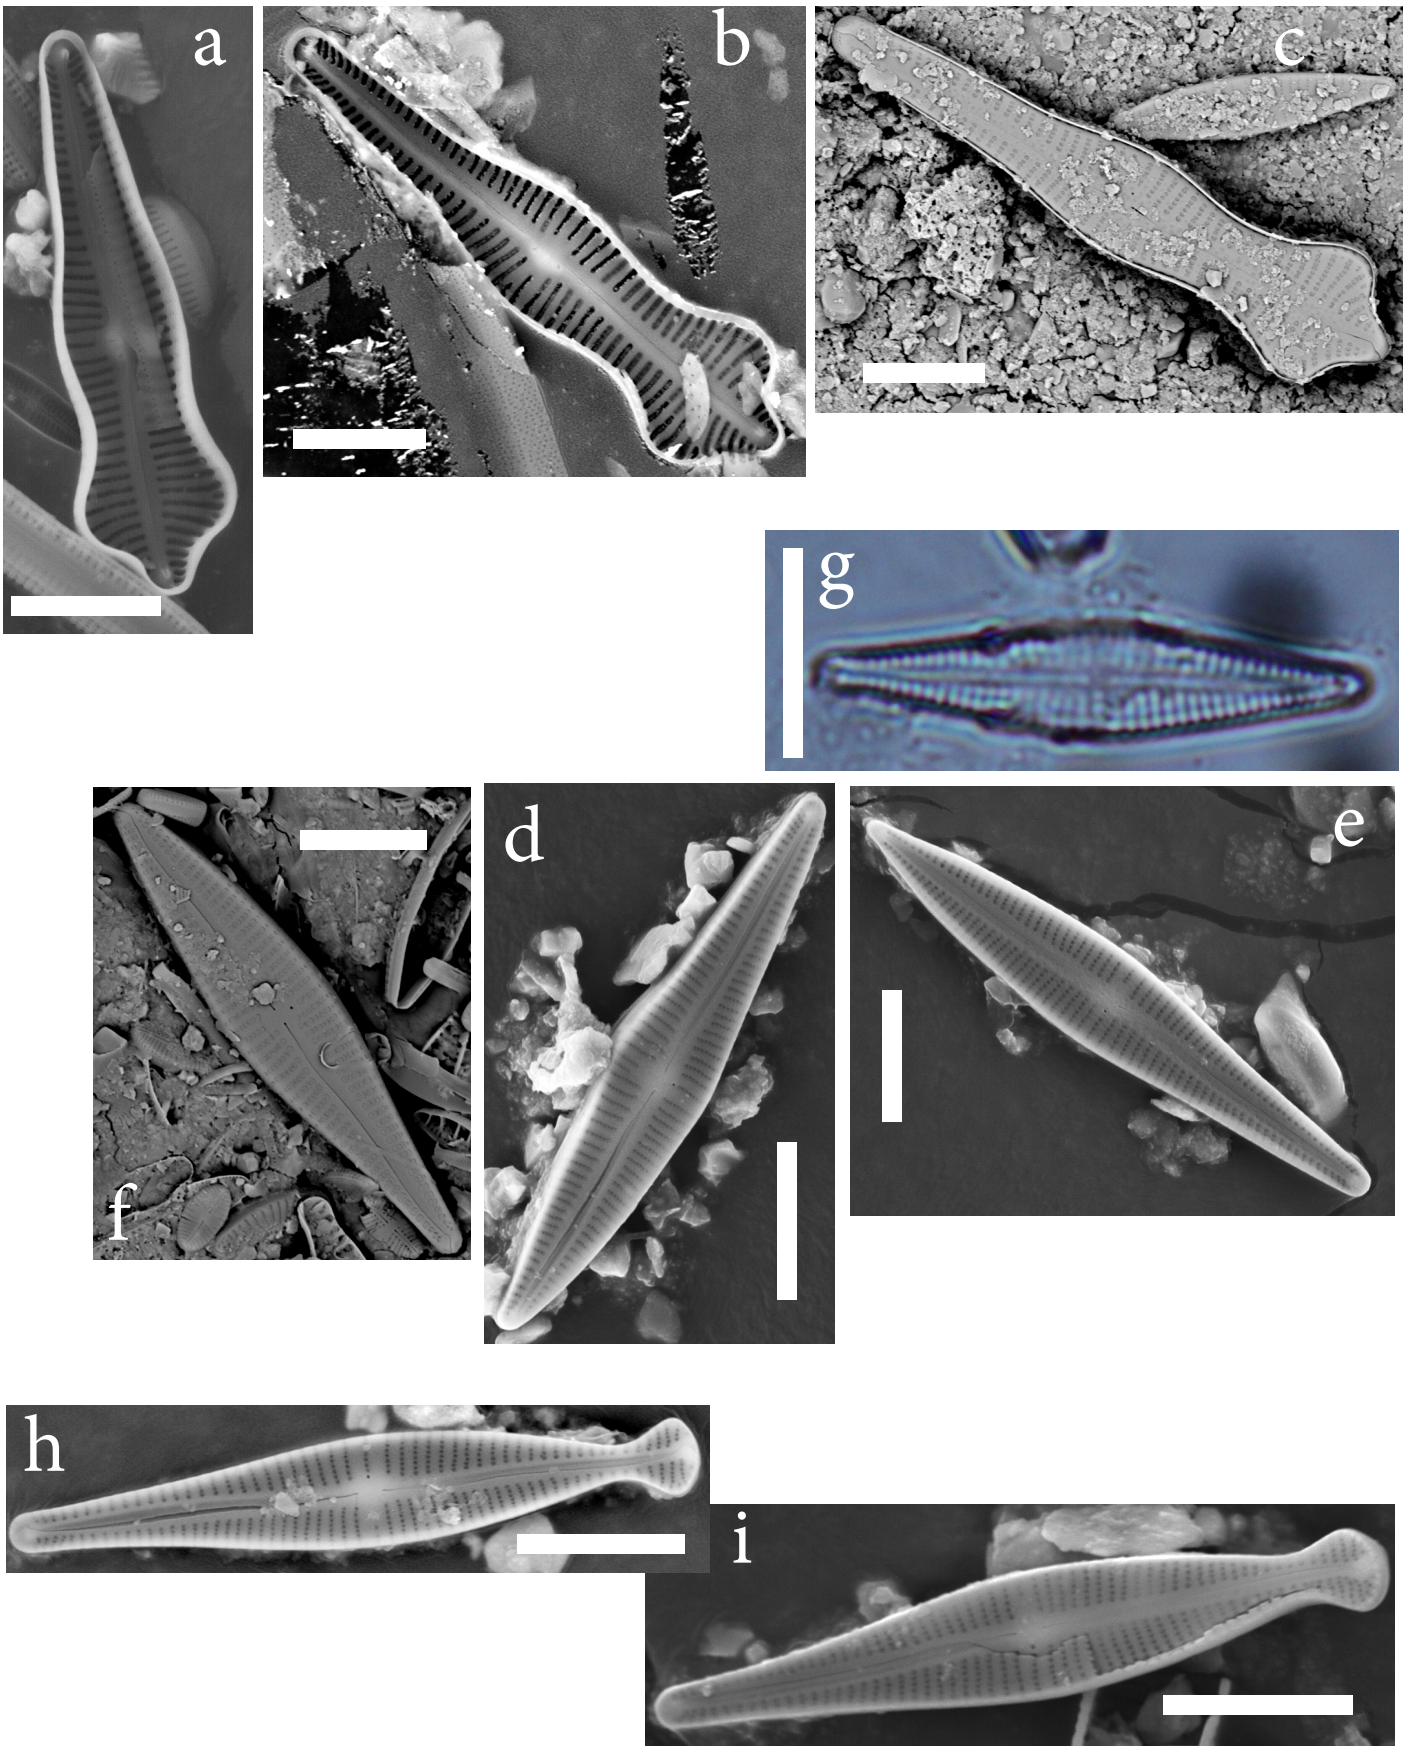

**a** *Gomphonema acuminatum* Ehrenberg; **b** *G. acuminatum*; **c** *G. acuminatum*;  
**d** *Gomphonema gracile* s.l. Ehrenberg; **e** *G. gracile* s.l.; **f** *G. gracile* s.l.; **g**  
*G. gracile* s.l.; **h** *Gomphonema pseudosphaerophorum* H.Kobayasi; **i** *G.*  
*pseudosphaerophorum*

all scale bars = 10 micrometers

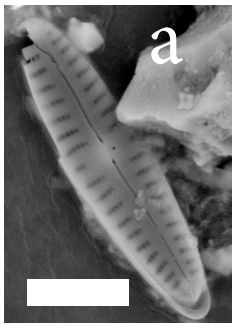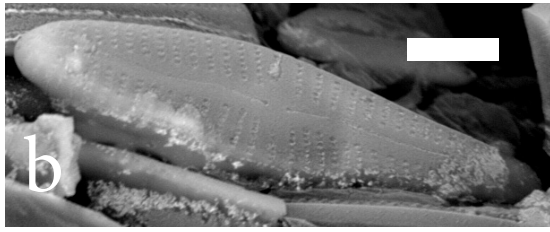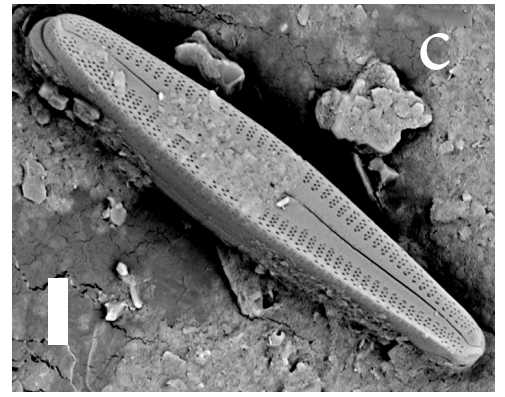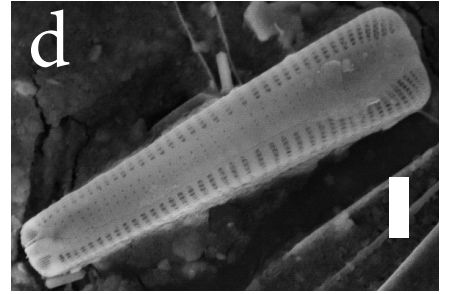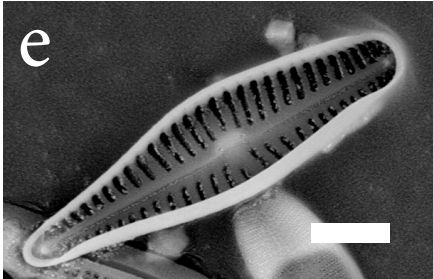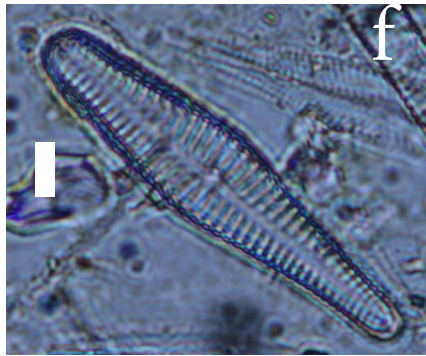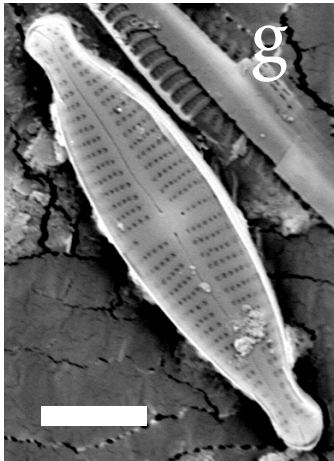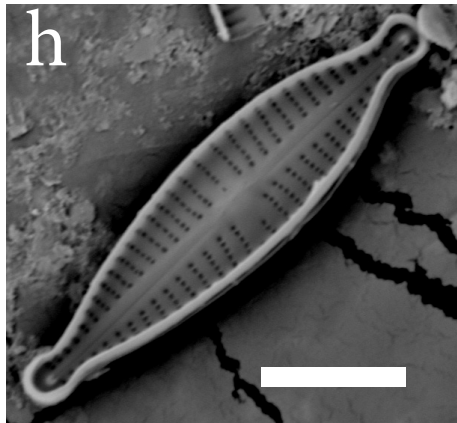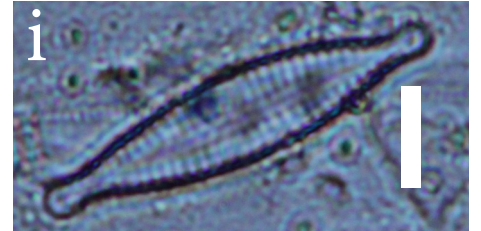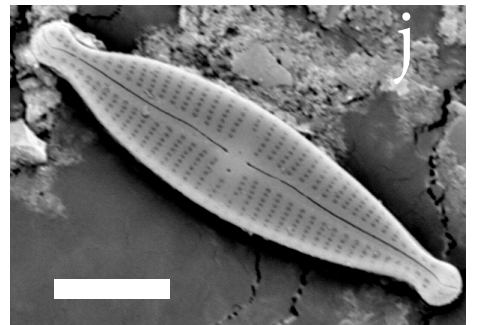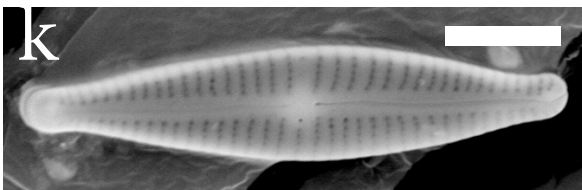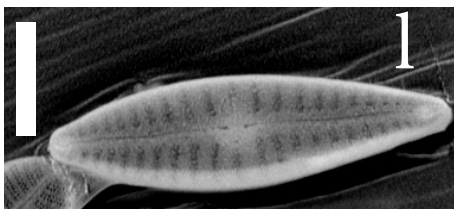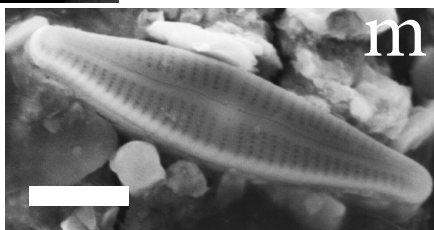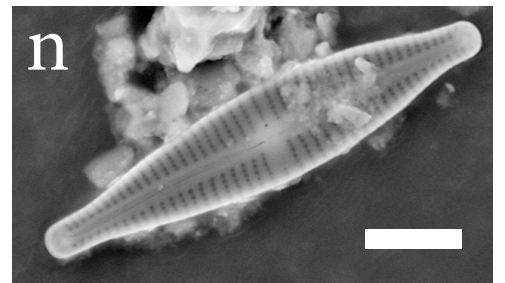

**a** *Gomphonema minutum* (C.Agardh) C.Agard; **b** *Gomphonema insigne* W.Gregory; **c** *Gomphonema venusta* Passy, Kociolek & Lowe; **d** *G. venusta*; **e** *Gomphonema cf affine* Kützing; **f** *G. cf affine*; **g** *Gomphonema lagenula* Kützing; **h** *G. lagenula*; **i** *G. lagenula*; **j** *G. lagenula*; **k** *Gomphonema parvulum* (Kützing) Kützing; **l** *G. parvulum*; **m** *G. parvulum*; **n** *G. parvulum*

scale bars = 5 micrometers

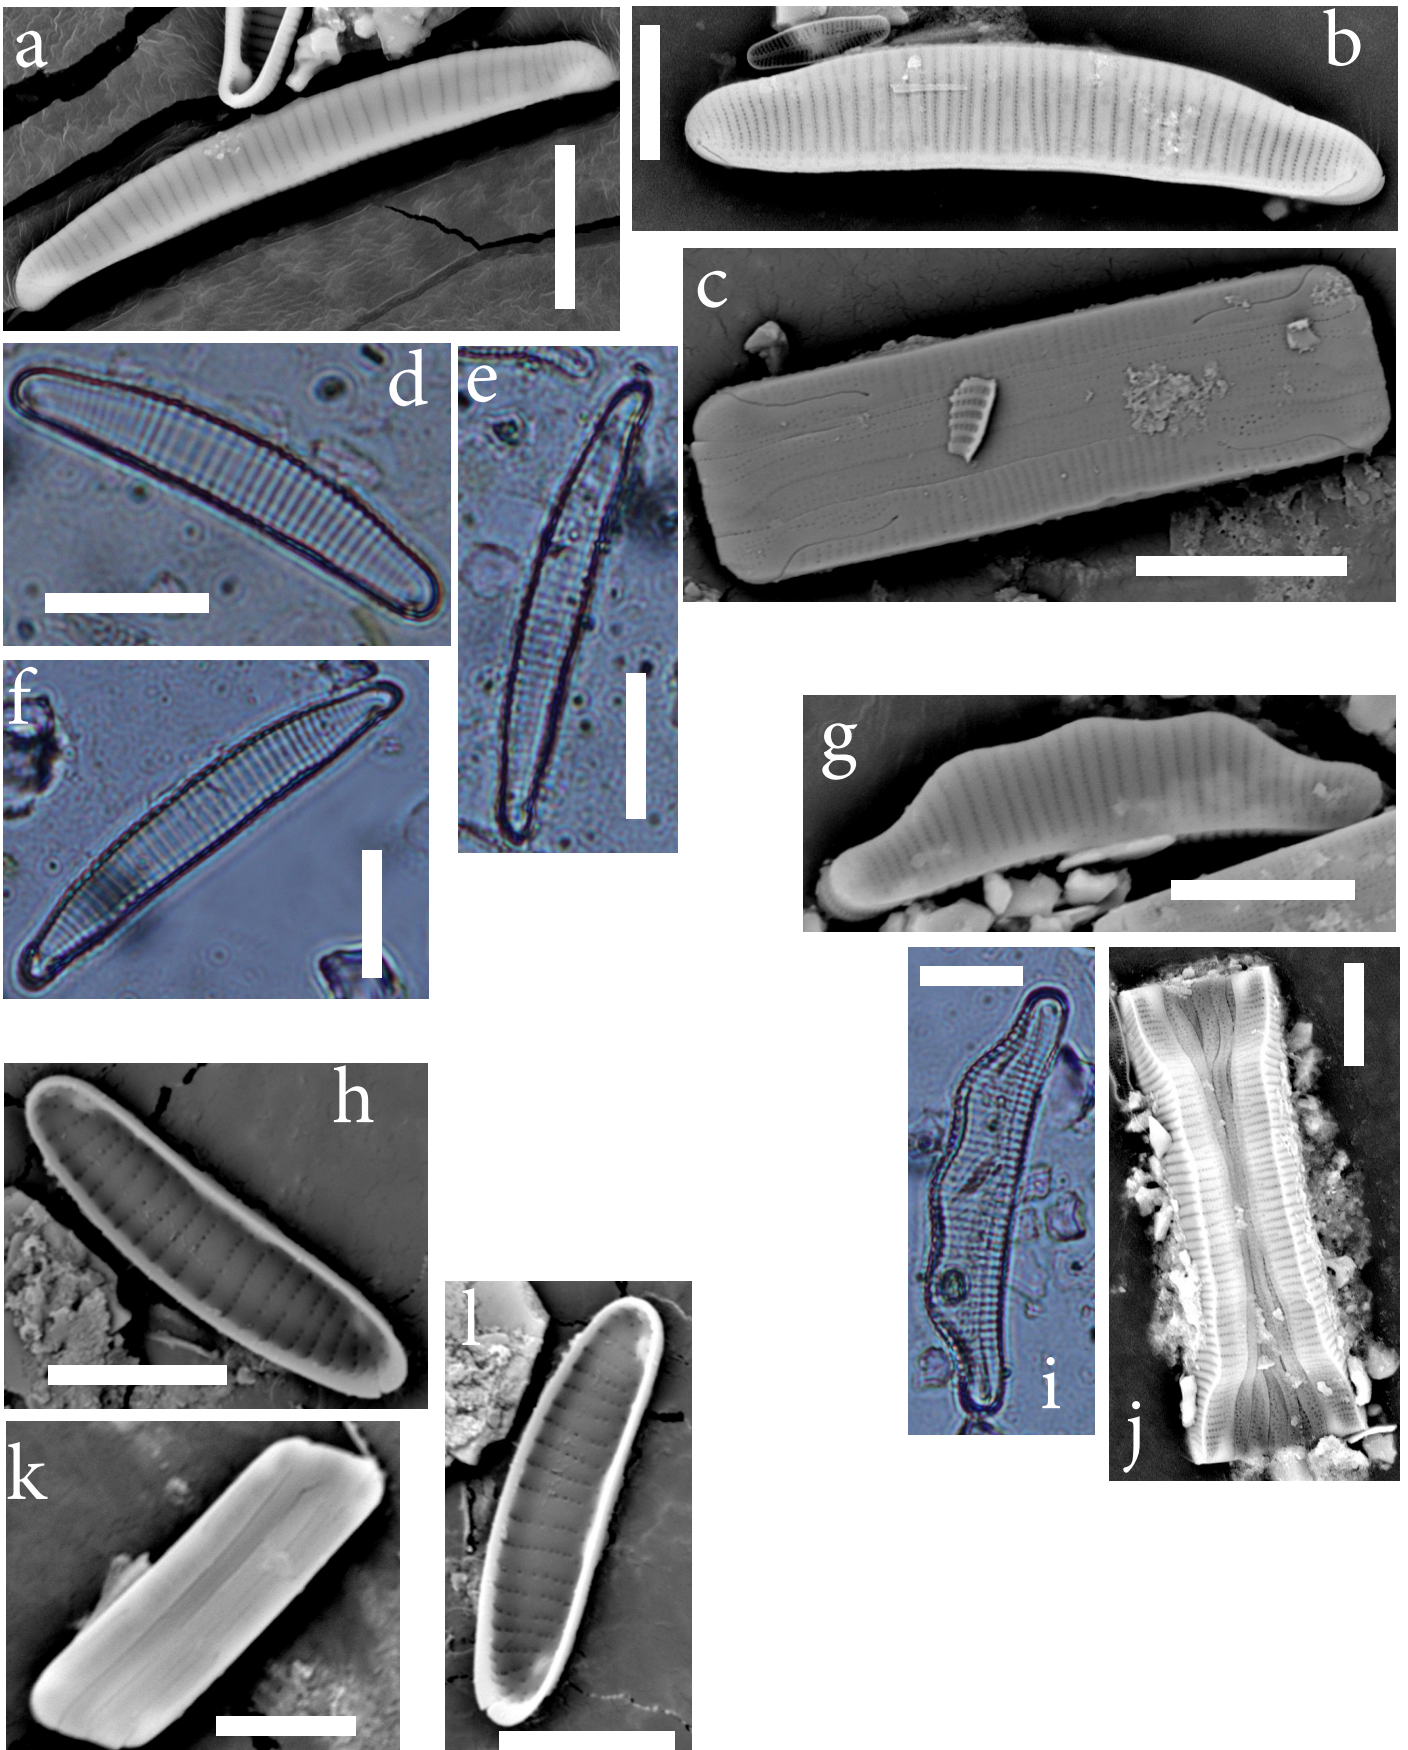

**a** *Eunotia cf. minor* (Kützinger) Grunow; **b** *E. cf. minor*; **c** *E. cf. minor*; **d** *E. cf. minor*; **e** *E. cf. minor*; **f** *E. cf. minor*; **g** *Eunotia pectinalis* var. *undulata* (Ralfs) Rabenhorst; **h** *Eunotia rhomboidea* Hustedt; **i** *E. pectinalis* var. *undulata*; **j** *E. pectinalis* var. *undulata*; **k** *E. rhomboidea*; **l** *E. rhomboidea*  
 scale bars (a-k) = 10 micrometers; scale bars (l-o) = 5 micrometers

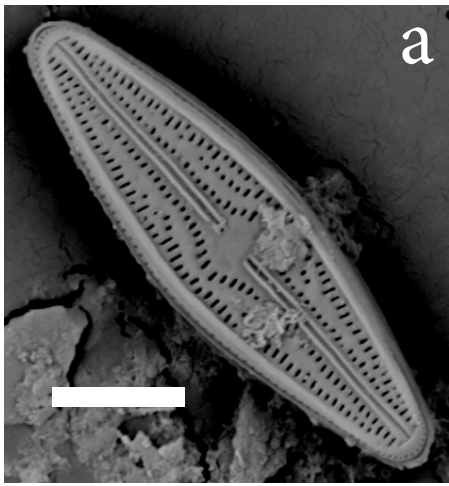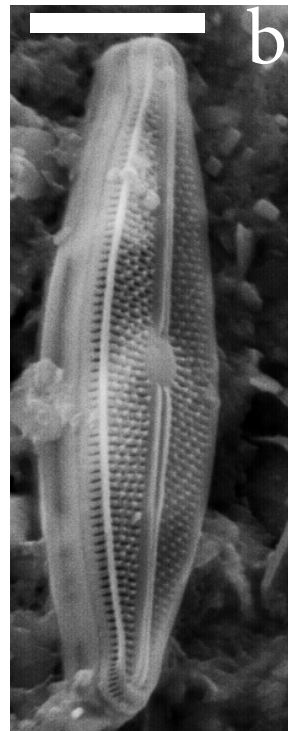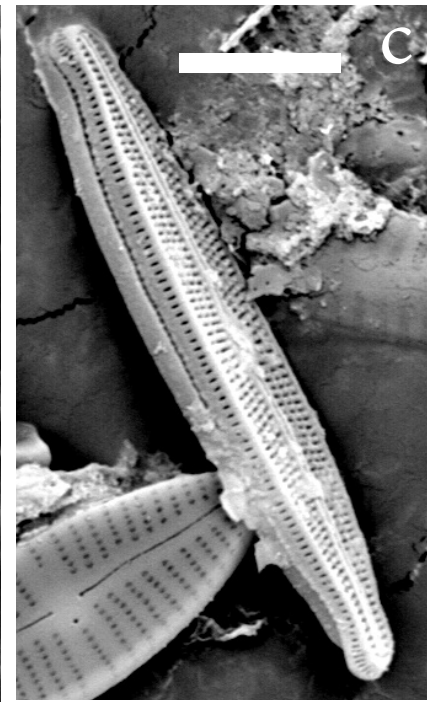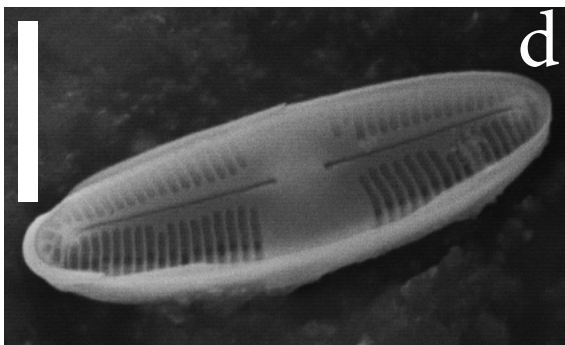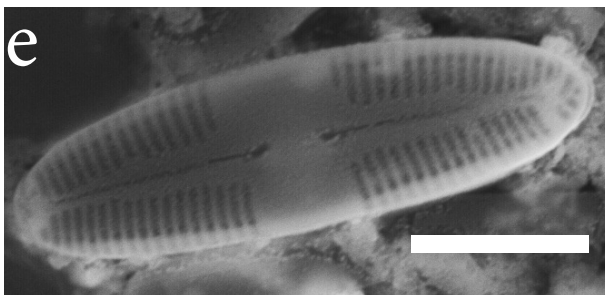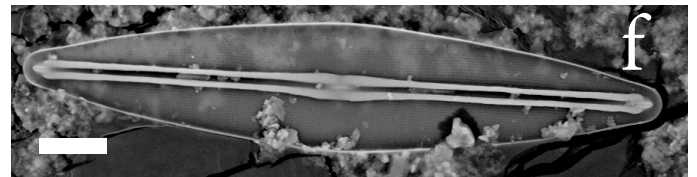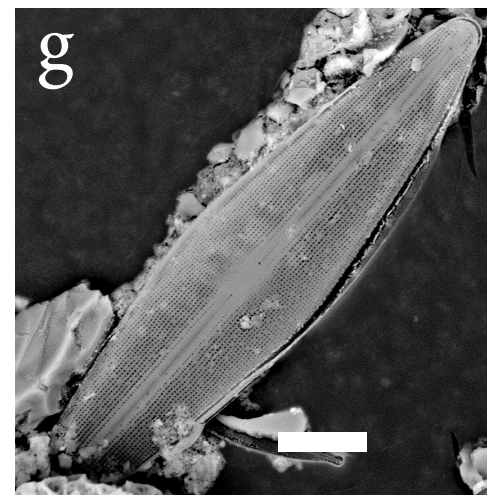

**a** *Brachysira brebissonii* R.Ross; **b** *Brachysira neoexilis* Lange-Bertalot; **c** *B. neoexilis*; **d** *Caloneis bacillum* (Grunow) Cleve; **e** *C. bacillum*; **f** *Frustulia saxonica* Rabenhorst; **g** *F. saxonica*  
scale bars (a-e) = 5 micrometers; scale bars (f-h) = 10 micrometers

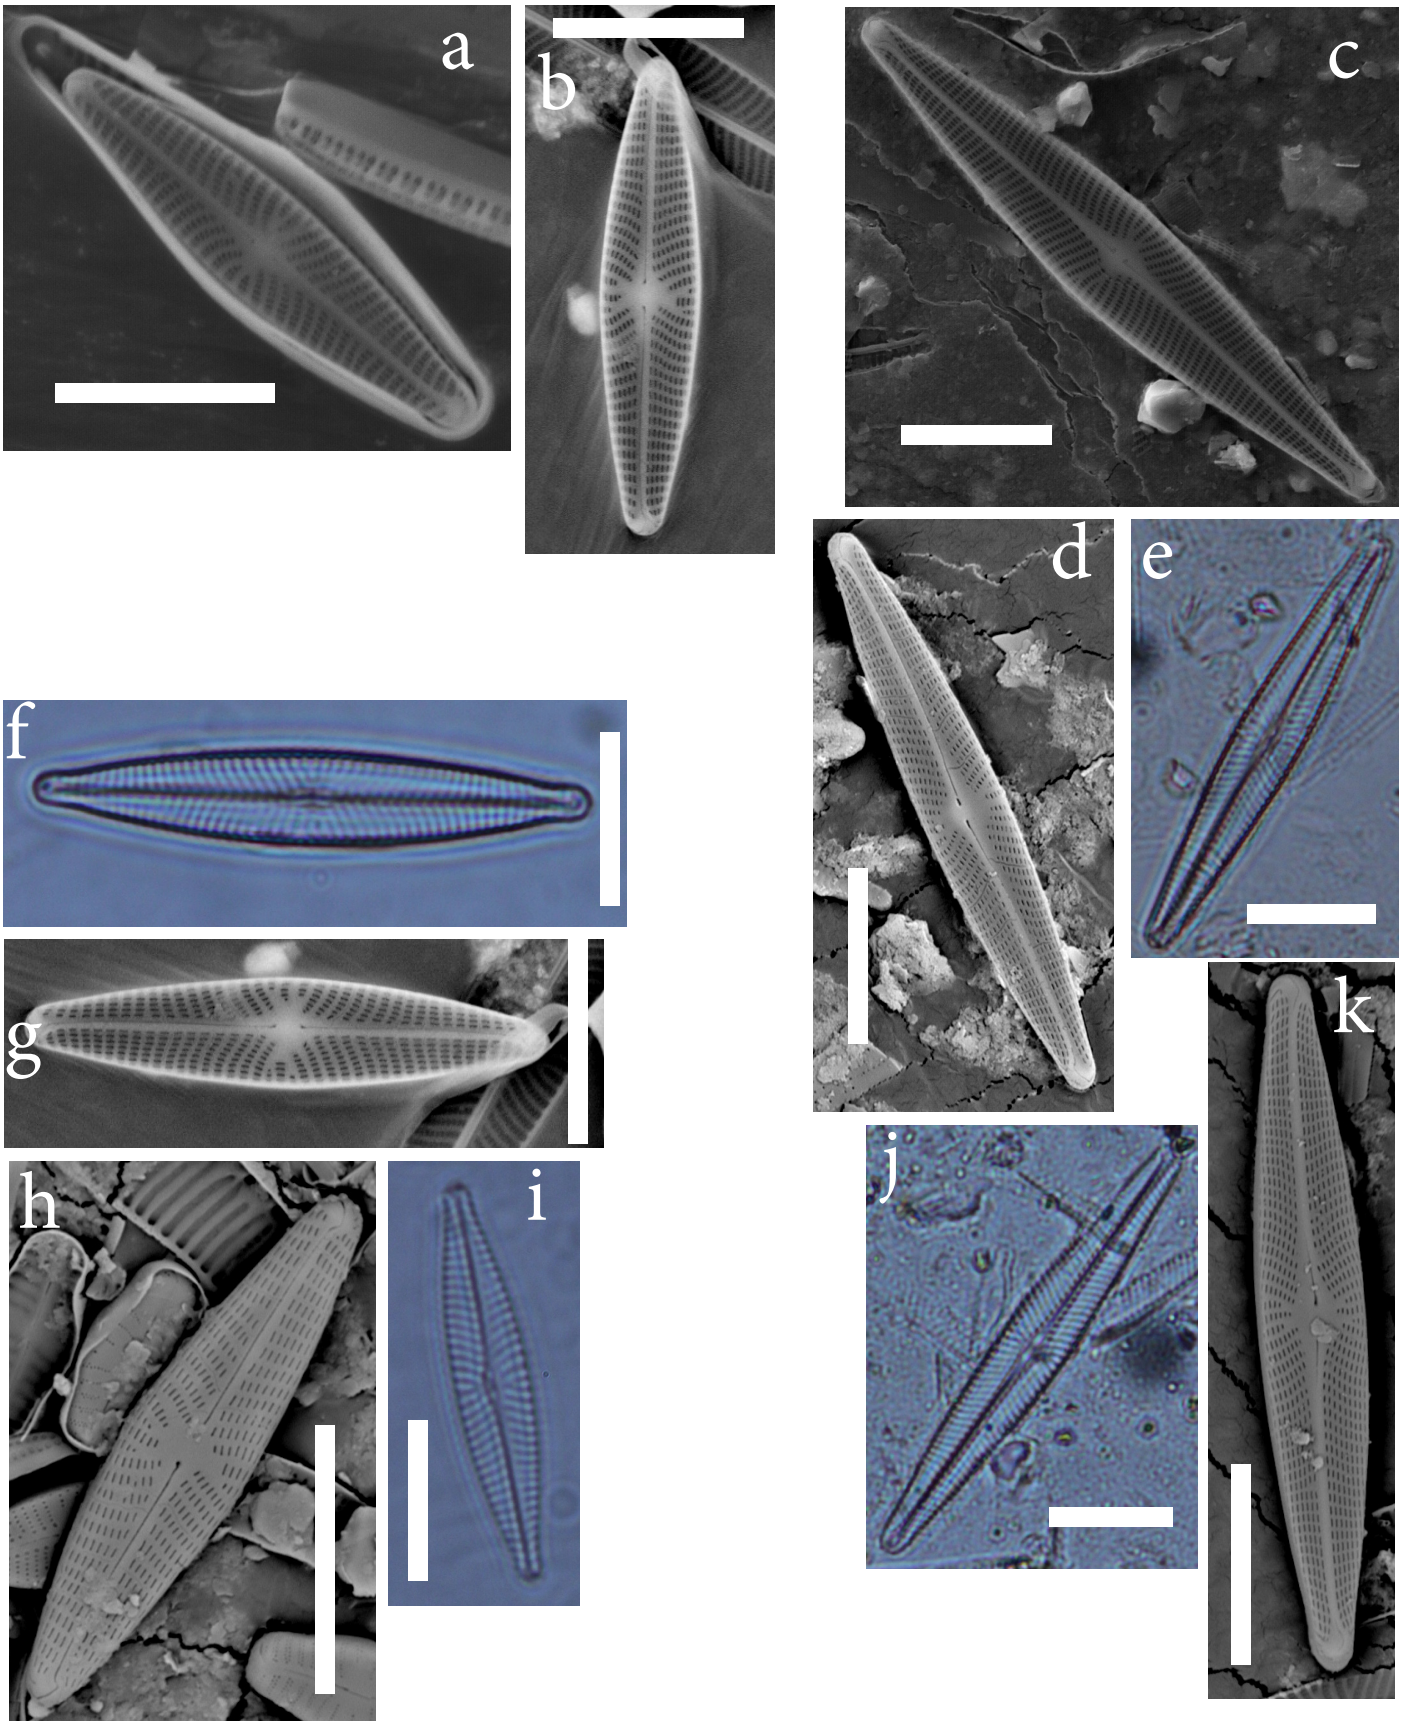

**a** *Navicula cryptotenella* Lange-Bertalot; **b** *N. cryptotenella*; **c** *Navicula radiosa* Kützing; **d** *N. radiosa*; **e** *N. radiosa*; **f** *Navicula cf. zanonii* Hustedt; **g** *N. cf. zanonii* **h** *N. cf. zanonii*; **i** *N. cf. zanonii*; **j** *N. radiosa*; **k** *N. radiosa*

all scale bars = 10 micrometers

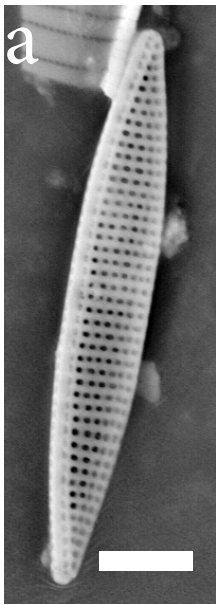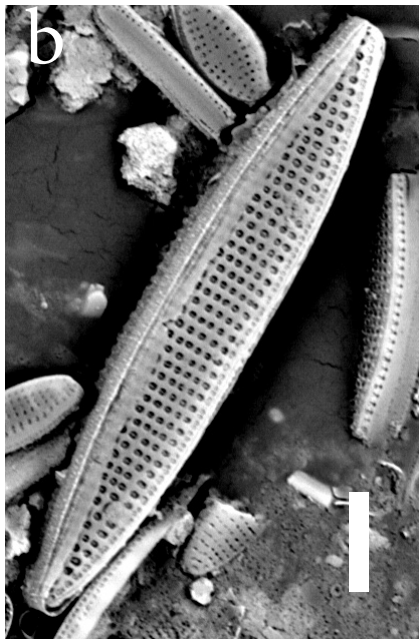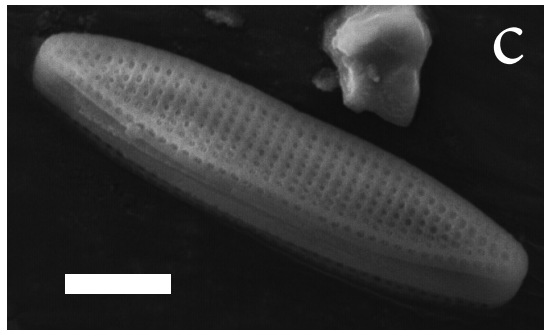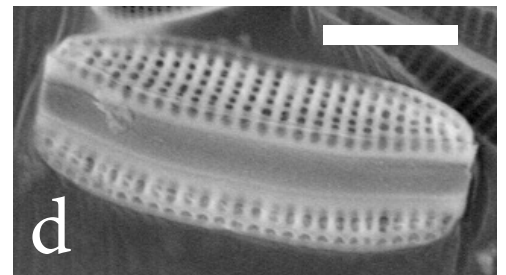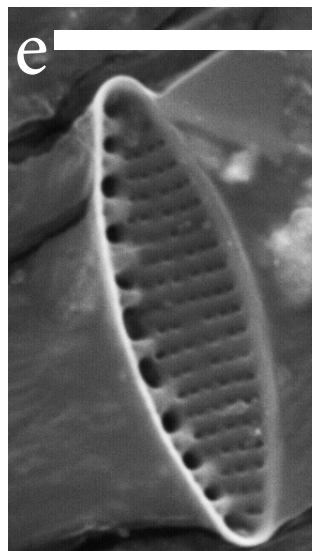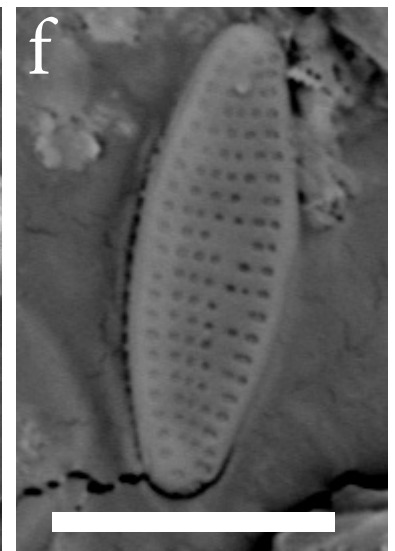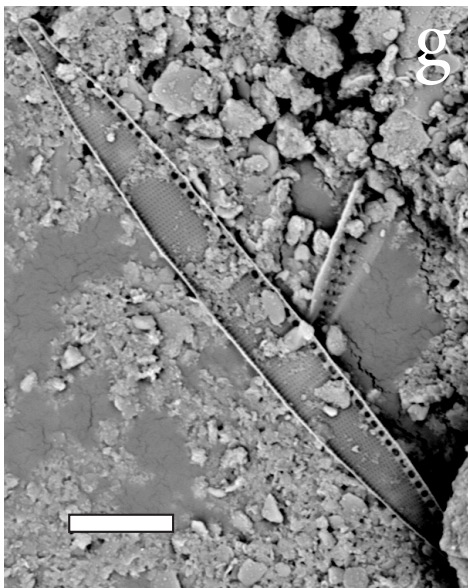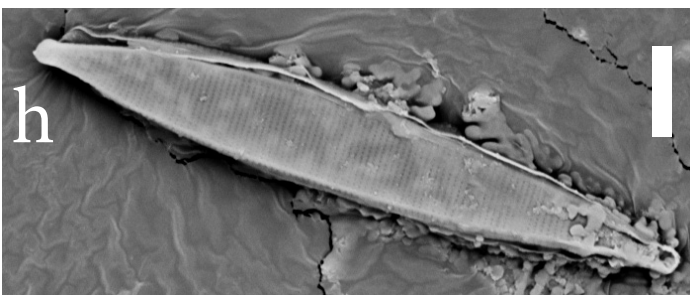

**a** *Nitzschia amphibia* Grunow; **b** *N. amphibia*; **c** *N. amphibia*; **d** *Nitzschia frustulum* (Kützing) Grunow; **e** *N. frustulum*; **f** *N. frustulum*; **g** *Nitzschia cf. palea* (Kützing) W.Smith; **h** *N. cf. palea*

all scale bars = 5 micrometers

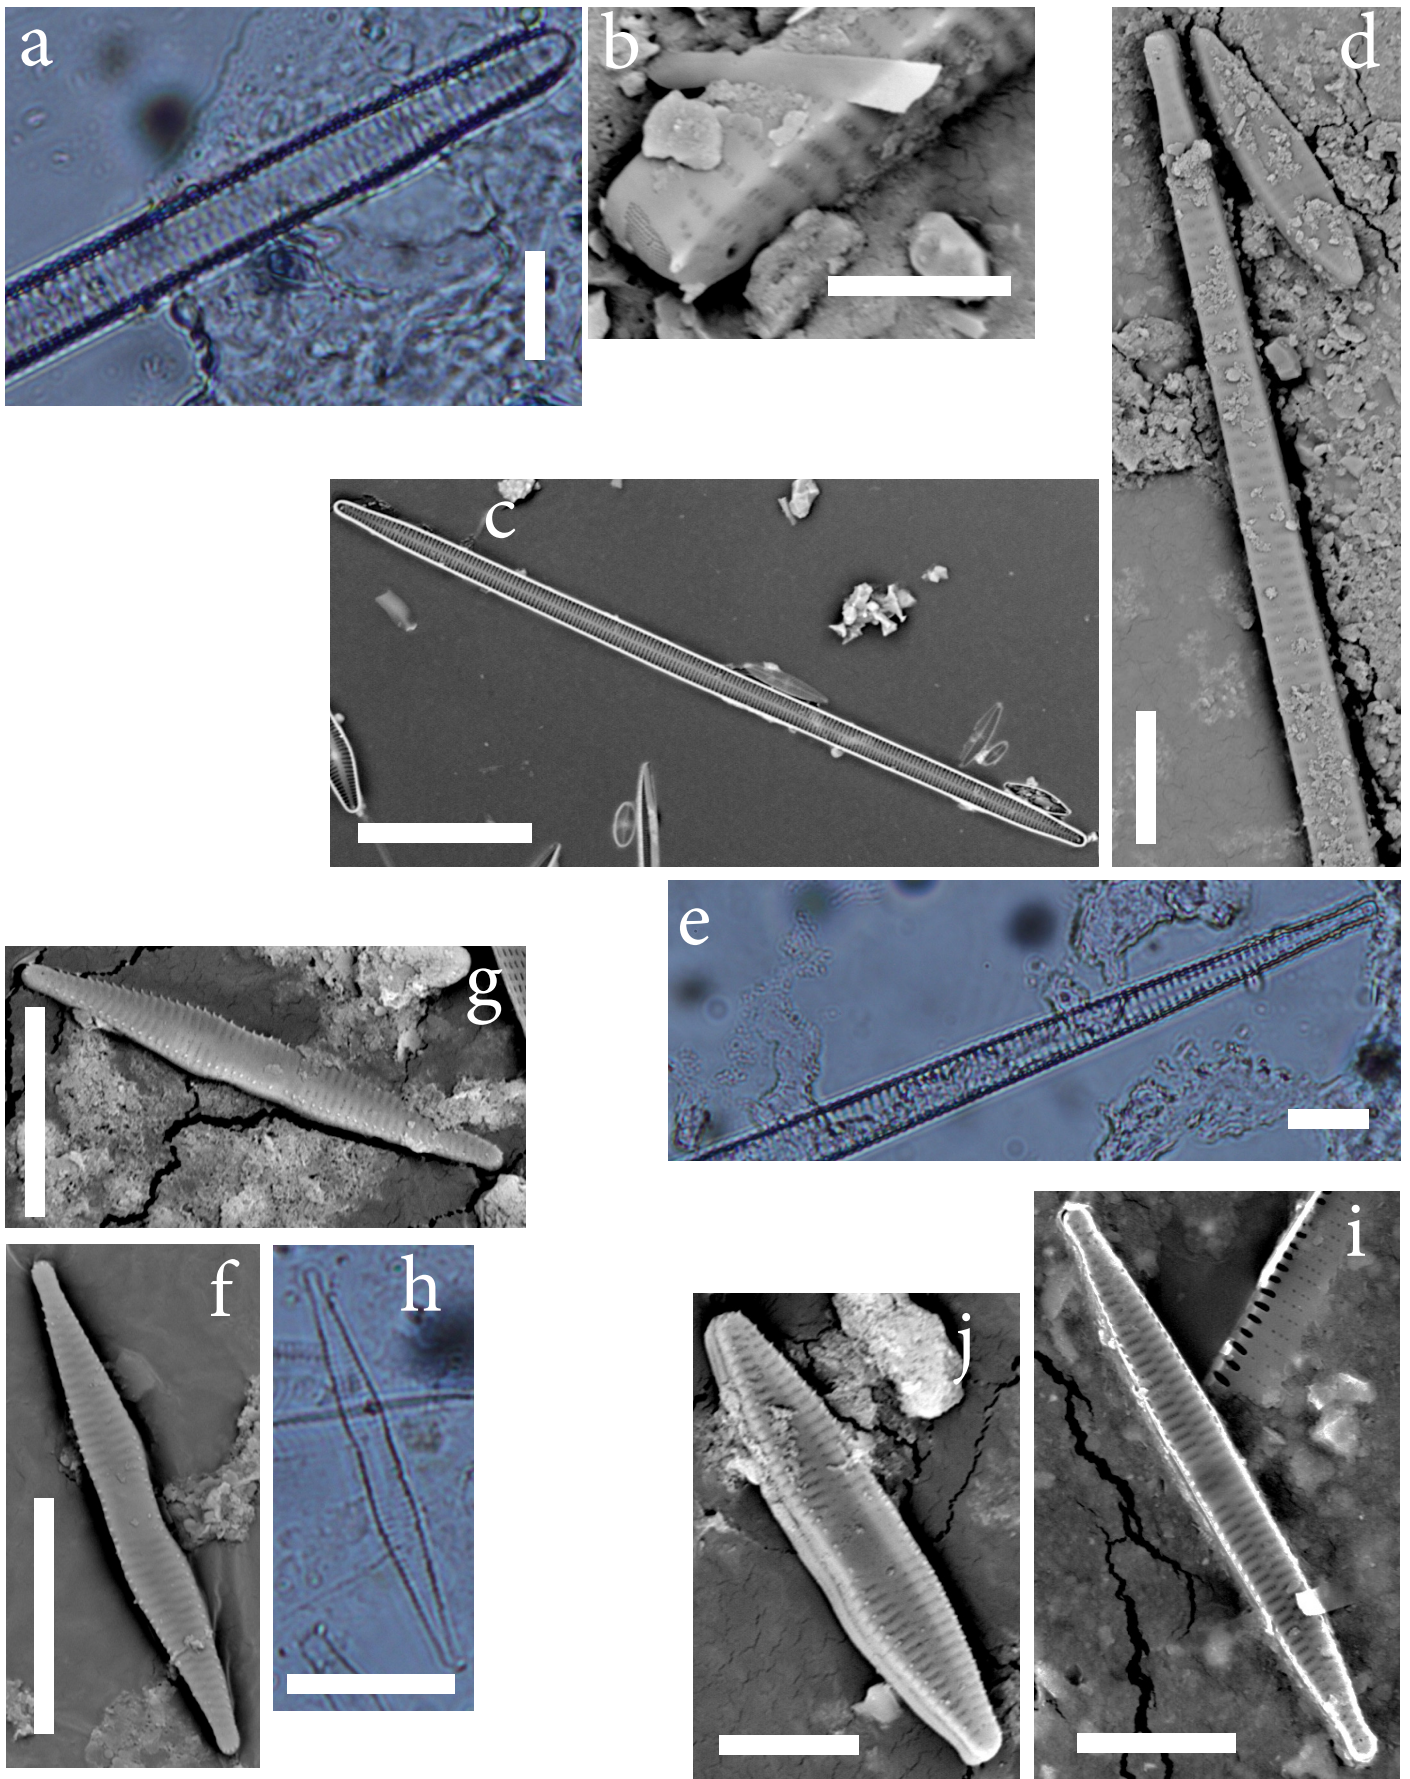

**a** *Ulnaria* cf. *biceps* (Kützing) Compère; **b** *U. cf. biceps*; **c** *Ulnaria* cf. *ulnabiseriata* D.M.Williams & B.Liu; **d** *U. cf. ulnabiseriata*; **e** *U. cf. ulnabiseriata*; **f** *Ulnaria* cf. *contracta* (Østrup) E.A.Morales & M.L.Vis; **g** *U. cf. contracta*; **h** *U. cf. contracta*; **i** *Fragilaria capucina* Desmazières; **j** *F. capucina*  
 scale bars (a, d-i) = 10 micrometers; scale bars (b, j) = 5 micrometers; scale bars (c) = 50 micrometers

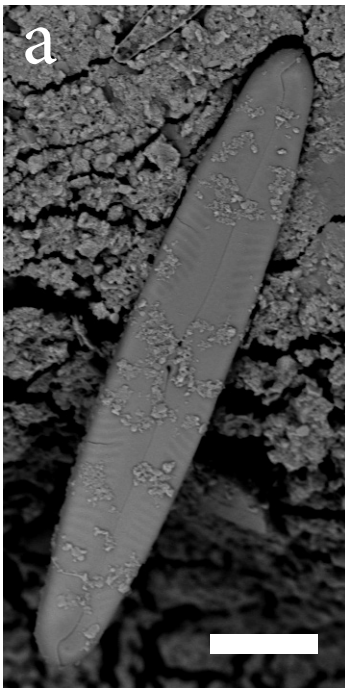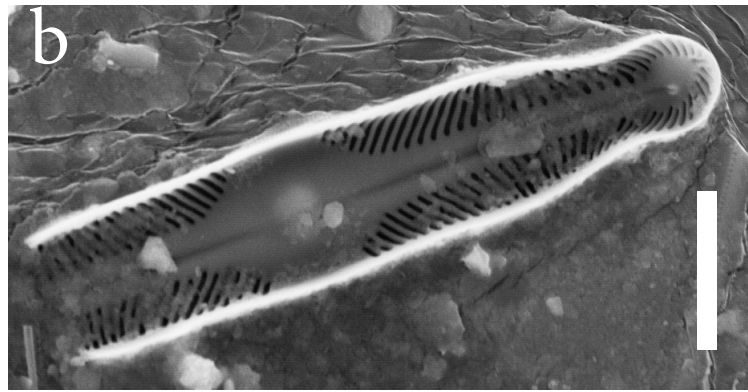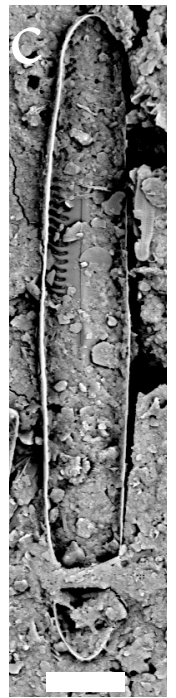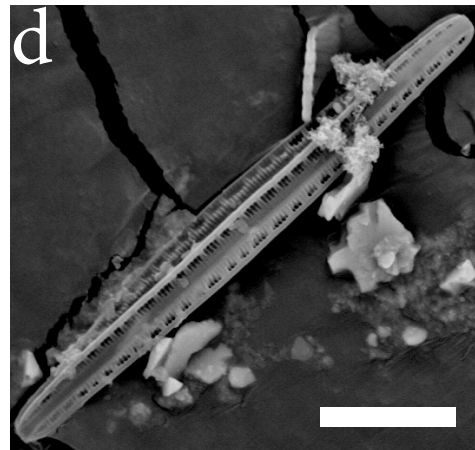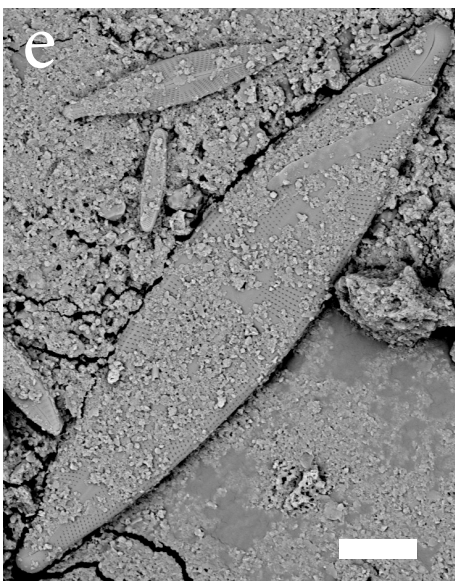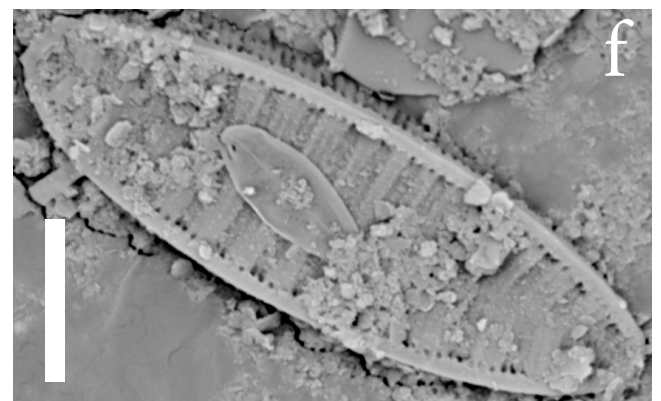

**a** *Pinnularia divergens* W.Smith; **b** *Pinnularia gibba* (Ehrenberg) Ehrenberg; **c** *Pinnularia tropica* Cholnoky; **d** *Iconella* spp. Jurilj; **e** *Stauroneis phoenicenteron* (Nitzsch) Ehrenberg; **f** *Surirella angusta* Kützing  
scale bars (a-f) = 10 micrometers; scale bars (g) = 5 micrometers
